# Supplementary material
Source: MDPI journal article supplement (https://www.mdpi.com/2071-1050/11/3/564)
Supplement: s1 [file s1]

Thank you for participating in the **Water Resource Preferences in Northern Nevada** research study. Your responses are completely confidential. Once you have completed the questionnaire, please return it in the pre-paid envelope provided.

***Section A: Your general attitudes/preferences***

In this section, we would like to learn about your personal preferences. Please mark the appropriate box.

1. What type of water do you drink most often?

☐ Tap water

☐ Filtered tap water

☐ Bottled water

2. I prefer to live in:

☐ Rural areas

☐ Suburban areas

☐ Urban areas

In this section, we would like to learn about your general attitudes. Please read each statement and mark the number that corresponds with your answer, using the following key:

**1 = strongly disagree, 2 = disagree, 3 = neutral, 4 = agree, 5 = strongly agree, ? = don't know**

|                                                                     | ← Disagree                      Agree → |   |   |   |   |   |
|---------------------------------------------------------------------|-----------------------------------------|---|---|---|---|---|
| 3. I am satisfied with my tap water quality                         | 1                                       | 2 | 3 | 4 | 5 | ? |
| 4. I am satisfied with my tap water taste                           | 1                                       | 2 | 3 | 4 | 5 | ? |
| 5. My water supply is reliable                                      | 1                                       | 2 | 3 | 4 | 5 | ? |
| 6. My water bill is affordable                                      | 1                                       | 2 | 3 | 4 | 5 | ? |
| 7. I am concerned about long-term water supplies in northern Nevada | 1                                       | 2 | 3 | 4 | 5 | ? |

8. What water issue in northern Nevada matters most to you?

## Section B: Reclaimed water

Treated wastewater (sewage effluent) is normally discharged into rivers, but can be reclaimed for recycling. In fact, reclaimed water is also known as recycled water. “Reclaimed water” is typically defined as the use of treated wastewater for a beneficial purpose. The type and level of wastewater treatment determines the water quality.

9. Have you heard of reclaiming treated wastewater before?

☐ Yes ☐ No ☐ Unsure

Reclaimed water can be used to supplement the drinking water supply. In most places, this means adding highly treated reclaimed water to the underground water table and later pumping the blended water to utilities for treatment and delivery.

10. Would you be willing to drink tap water blended with reclaimed water if it was treated to a water quality level that matched or exceeded your current tap water quality?

☐ Yes ☐ No ☐ Unsure

In this section, we would like to learn about which uses of reclaimed water are acceptable to you. For the purposes of this study, please assume that all reclaimed water has been sufficiently treated to meet appropriate health and water quality standards. Read each potential use for reclaimed water below and mark the number that corresponds with your answer, using the following key:

**1 = strongly oppose, 2 = oppose, 3 = neutral, 4 = support, 5 = strongly support, ? = don’t know**

| Reclaimed water used:                                              | ← Oppose Support → |   |   |   |   |   |
|--------------------------------------------------------------------|--------------------|---|---|---|---|---|
| 11. for industrial purposes (e.g., in manufacturing processes)     | 1                  | 2 | 3 | 4 | 5 | ? |
| 12. to water lawns in public parks                                 | 1                  | 2 | 3 | 4 | 5 | ? |
| 13. to water edible crops (e.g., fruits, vegetables)               | 1                  | 2 | 3 | 4 | 5 | ? |
| 14. to water non-edible crops (e.g., alfalfa, hay)                 | 1                  | 2 | 3 | 4 | 5 | ? |
| 15. to replenish groundwater supplies (i.e., underground aquifers) | 1                  | 2 | 3 | 4 | 5 | ? |
| 16. to replenish surface water supplies (e.g., reservoirs, lakes)  | 1                  | 2 | 3 | 4 | 5 | ? |
| 17. to water household lawns                                       | 1                  | 2 | 3 | 4 | 5 | ? |
| 18. to wash laundry                                                | 1                  | 2 | 3 | 4 | 5 | ? |
| 19. for toilet flushing                                            | 1                  | 2 | 3 | 4 | 5 | ? |
| 20. for bathing                                                    | 1                  | 2 | 3 | 4 | 5 | ? |
| 21. for cleaning                                                   | 1                  | 2 | 3 | 4 | 5 | ? |
| 22. for cooking                                                    | 1                  | 2 | 3 | 4 | 5 | ? |
| 23. for drinking                                                   | 1                  | 2 | 3 | 4 | 5 | ? |

### Section C: Information sources

In this section, we would like to learn how much you trust the following information sources to provide accurate information about water resources in northern Nevada. Please mark the number that corresponds with your answer, using the following key:

**1 = distrust completely, 2 = mostly distrust, 3 = neutral, 4 = mostly trust, 5 = trust completely, ? = unsure**

|                                                                         | ← Distrust |   |   | Trust → |   |   |  |
|-------------------------------------------------------------------------|------------|---|---|---------|---|---|--|
| 24. wastewater treatment facilities                                     | 1          | 2 | 3 | 4       | 5 | ? |  |
| 25. water providers (i.e., information in water bills)                  | 1          | 2 | 3 | 4       | 5 | ? |  |
| 26. federal regulators (i.e., Environmental Protection Agency)          | 1          | 2 | 3 | 4       | 5 | ? |  |
| 27. state regulators (i.e., Nevada Department of Environmental Quality) | 1          | 2 | 3 | 4       | 5 | ? |  |
| 28. elected city officials (i.e., city council members)                 | 1          | 2 | 3 | 4       | 5 | ? |  |
| 29. elected county officials (i.e., county commissioners)               | 1          | 2 | 3 | 4       | 5 | ? |  |
| 30. academic researchers (i.e., universities)                           | 1          | 2 | 3 | 4       | 5 | ? |  |
| 31. environmental organizations                                         | 1          | 2 | 3 | 4       | 5 | ? |  |
| 32. local citizen groups                                                | 1          | 2 | 3 | 4       | 5 | ? |  |
| 33. private/independent consultants                                     | 1          | 2 | 3 | 4       | 5 | ? |  |
| 34. neighbors, friends or family members                                | 1          | 2 | 3 | 4       | 5 | ? |  |
| 35. media (e.g., internet, radio, TV, newspapers)                       | 1          | 2 | 3 | 4       | 5 | ? |  |

### Section D: Possible water management strategies

There are a number of potential water management strategies available in northern Nevada. In this section, we would like to learn about your water management preferences. Please **rank** your support for the following strategies on a scale from **1–5**, with **1 as the most preferred, 2 as the second most preferred**, and so on.

|  |                                                                     |
|--|---------------------------------------------------------------------|
|  | 36. Adding reclaimed water to drinking water supplies               |
|  | 37. Limiting population growth and development                      |
|  | 38. Raising water rates                                             |
|  | 39. Requiring household conservation (i.e. water restrictions)      |
|  | 40. Transferring water from farms to the cities or industrial users |

### ***Section E: Your household characteristics***

Please mark the appropriate box.

41. Which category best describes where you live?

☐ City/town

☐ Suburb

☐ Countryside/rural

42. Where do you get your household water supply?

☐ Water utility/company

☐ Domestic well

☐ Unsure

43. How is your household wastewater disposed?

☐ Sewer utility/company

☐ Septic system

☐ Unsure

44. How many years have you lived in your current home? \_\_\_\_\_

### ***Section F: Demographic information***

Please mark the appropriate box or specify your answer.

45. What is your 5-digit ZIP code? \_\_\_\_\_

46. Gender: ☐ Male ☐ Female

47. Age: ☐ 18-24 ☐ 25-44 ☐ 45-64 ☐ 65 and above

48. What is your occupation? \_\_\_\_\_

### ***Section G: Additional opinions***

49. Please use the space below to provide any comments you would like to share.
